# Supplementary material
Source: PubMed Central journal article supplement (PMC5291289)
Supplement: NIHMS846431-supplement-1.pdf [file NIHMS846431-supplement-1.pdf]

## Supporting Information

### Development of an Integrated Pipeline for Profiling Microbial Proteins from Mouse Fecal Samples by LC-MS/MS

*Jing Wu<sup>1</sup>, Jianhui Zhu<sup>1</sup>, Haidi Yin<sup>1</sup>, Xinhua Liu<sup>1,2</sup>, Mingrui An<sup>1</sup>, Nicholas A. Pudlo<sup>3</sup>, Eric C. Martens<sup>3</sup>, Grace Y. Chen<sup>4</sup>, and David M. Lubman<sup>1\*</sup>*

<sup>1</sup>University of Michigan, Department of Surgery, Ann Arbor, MI 48109

<sup>2</sup>Experiment Center for Science and Technology, Shanghai University of Traditional Chinese Medicine, Shanghai 201203, China

<sup>3</sup>University of Michigan, Department of Microbiology and Immunology, Ann Arbor, MI 48109

<sup>4</sup>University of Michigan, Division of Hematology/Oncology, Department of Internal Medicine, Ann Arbor, MI 48109

**Title running head:** An Effective Pipeline for Metaproteomic Characterization

\* To whom correspondence should be addressed. David M. Lubman, Department of Surgery, The University of Michigan Medical Center, 1150 West Medical Center Drive, Building MSRB1 Rm A510B, Ann Arbor, MI 48109-0656. E-mail: dmlubman@umich.edu. Telephone: 734-647-8834, Fax: 734-615-2088.

### Table of SI Contents

| <b>SI</b> | <b>Description</b>                                                                                                            | <b>Pages</b> |
|-----------|-------------------------------------------------------------------------------------------------------------------------------|--------------|
| Figure S1 | Level of colonization on days 10 and 14 after gavage of 11 member bacterial community into germfree mice as assessed by qPCR. | S-3          |
| Figure S2 | Number of proteins identified from the 11-bacteria cocktail before and after inoculation to the mice.                         | S-4          |
| Table S1  | The bacterial-specific primers were used for qPCR                                                                             | S-5          |
| Table S2  | Total proteins and peptides identified from the 5 stool samples from the 5 different mice by the LCE and FA methods.          |              |

**Supplemental Figure S1.** Level of colonization by 11 bacterial species on days 11 and 14 after gavage of germfree mice (N=6). Bacterial DNA was isolated using the Mobio DNA extraction kit followed by qPCR using bacterial specific primers. Bars represent mean abundance of each bacteria strain relative to total bacteria as assessed by a universal bacterial primer. Error bars indicate standard deviation.

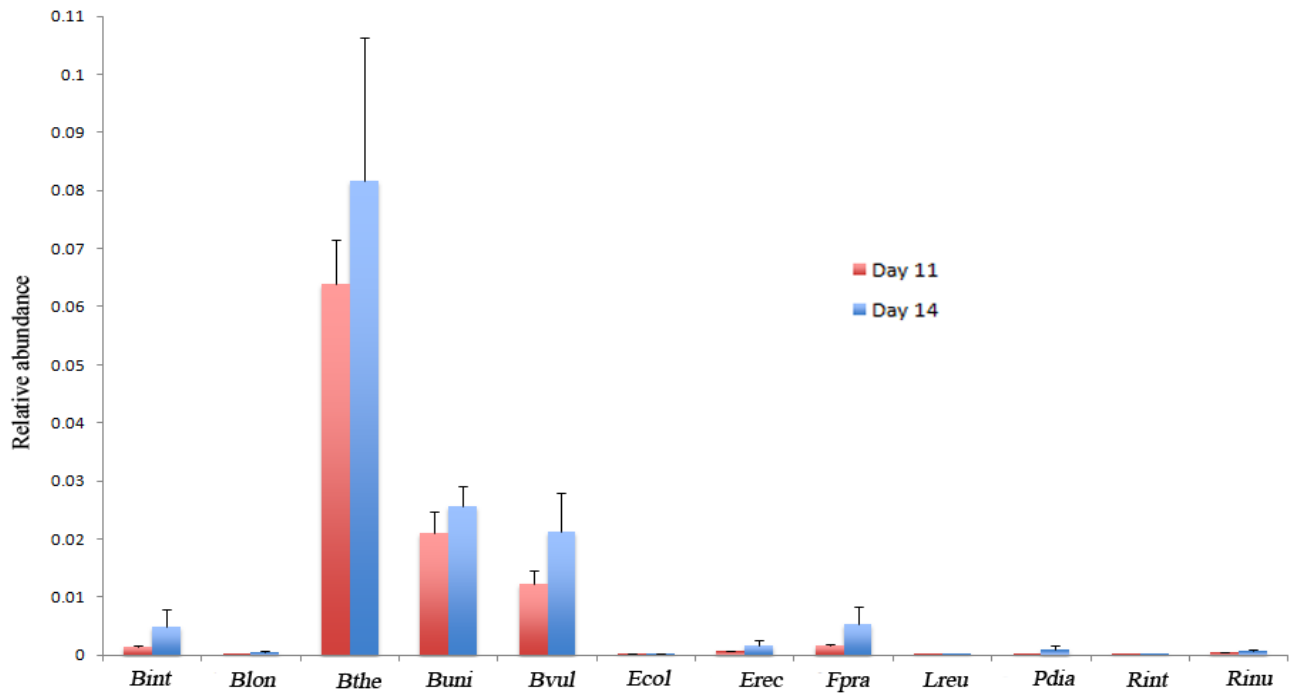

**Supplemental Figure S2.** The number of proteins identified from the 11-bacteria cocktail before and after inoculation to the mice. *Error bar* indicates standard deviation.

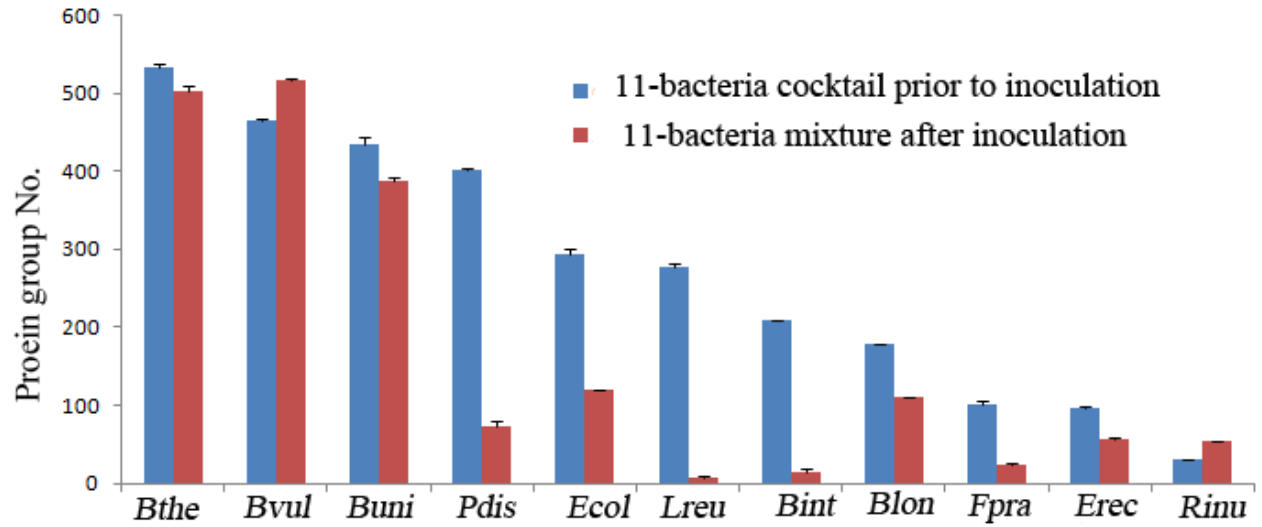

**Supplemental Table S1.** The bacterial-specific primers were used for qPCR

| Name        | Forward and reverse primer sequence (5'-3')          |
|-------------|------------------------------------------------------|
| <i>Bint</i> | TATTGGCACAAGCCATCGTA<br>CACTTTGGCTACGGCTTTGT         |
| <i>Buni</i> | CTGATTGGGTGGACGCTATT<br>CACCTTCACGTTTGCATAA          |
| <i>Rint</i> | TAGTTCGGCAGAAAACCAC<br>TCTTACCGTCCCCGATGTAG          |
| <i>Bthe</i> | TGGTACTTTTGGGGCGAATAGC<br>CTCTGTTGTACCCCTTTTTGTTGTGA |
| <i>Erec</i> | ATCCGACACAGAAGCCAGAA<br>GGTAGTTCGGATCCACAGA          |
| <i>Lreu</i> | CGCTAGTGAAGGGTCAGGAG<br>AATTACTTGGAGCGCGTTTG         |
| <i>Rinu</i> | ATTCCGGGGATAAAGCAAAG<br>CAATACTGGCAACCTGCTCA         |
| <i>Blon</i> | GACAACCCGCAGTTCATCTT<br>CGTCGATGGTGATGATCTTG         |
| <i>Bvul</i> | AGCAAGCAACTCCCGAAGTA<br>TTCCAATACTGGCACCAA           |
| <i>Fpra</i> | AGGCCAGTGGAACATCTAGG<br>AGTAGGGCATGATGGACTCG         |
| <i>Ecol</i> | TTGTTATAACCGGAGTGCTG<br>CCCCGTTTCTCTCCATTTTT         |
| <i>Pdis</i> | CCGACGTGTTGAATGAGTTG<br>GCTGTACGGCGTCTTTCTTC         |
